# Supplementary material
Source: PubMed Central journal article supplement (PMC554835)
Supplement: pnas_102_11_4170__1.pdf [file pnas_102_11_4170__1.pdf]

**Table 1. The results of behavioral analysis of mGluR2<sup>-/-</sup> KO mice and their WT littermates**

|                                                  | +/+            | -/-            |
|--------------------------------------------------|----------------|----------------|
| Physical characteristics (WT = 21, KO = 19)      |                |                |
| Weight, g                                        | 25.2 (± 0.4)   | 25.5 (± 0.4)   |
| Whiskers (percent with normal whiskers)          | 90             | 95             |
| Fur (percent with normal fur)                    | 100            | 100            |
| Rectal temperature, °C                           | 36.6 (± 0.1)   | 36.7 (± 0.1)   |
| Sensory motor reflex (WT = 18, KO = 19)          |                |                |
| Eye blink (percent with normal response)         | 100            | 100            |
| Ear twitch (percent with quick response)         | 100            | 100            |
| Whisker twitch (percent with normal response)    | 100            | 100            |
| Righting reflex (percent with normal response)   | 100            | 100            |
| Acoustic startle response (arbitrary unit)       |                |                |
| Stimulus intensity = 110 dB                      | 0.69 (± 0.11)  | 0.59 (± 0.06)  |
| Stimulus intensity = 120 dB                      | 0.91 (± 0.13)  | 0.93 (± 0.07)  |
| Prepulse inhibition (WT = 18, KO = 19)           |                |                |
| Startle stimulus = 110 dB                        |                |                |
| Prepulse intensity = 74 dB (%)                   | 23.2 (± 5.3)   | 22.5 (± 6.5)   |
| Prepulse intensity = 78 dB (%)                   | 46.8 (± 7.3)   | 40.3 (± 6.5)   |
| Startle stimulus = 120 dB                        |                |                |
| Prepulse intensity = 74 dB (%)                   | 22.6 (± 9.0)   | 29.6 (± 5.0)   |
| Prepulse intensity = 78 dB (%)                   | 37.3 (± 6.9)   | 41.7 (± 3.9)   |
| Motor tests (WT = 21, KO = 19)                   |                |                |
| Wire hang (latency to fall, sec)                 | 54.9 (± 2.6)   | 56.2 (± 1.9)   |
| Grip strength, N                                 | 0.67 (± 0.029) | 0.66 (± 0.037) |
| Open field (WT = 19, KO = 17)                    |                |                |
| Time spent in center, sec                        | 160.4 (± 16.5) | 162.2 (± 23.3) |
| Light/dark transition test (WT = 21, KO = 19)    |                |                |
| Time spent in light box, sec                     | 204 (± 8.6)    | 204 (± 13.8)   |
| Number of light/dark transition                  | 23 (± 1.3)     | 25 (± 2.1)     |
| Elevated plus maze (WT = 21, KO = 19)            |                |                |
| Time spent on open arm, sec                      | 32.6 (± 6.8)   | 28.0 (± 4.9)   |
| Total number of arm entry                        | 28.9 (± 1.9)   | 31.7 (± 1.9)   |
| Number of open arm entry                         | 3.7 (± 0.6)    | 3.4 (± 0.6)    |
| Social interaction (WT = 10 pairs, KO = 9 pairs) |                |                |
| Total duration of contact, sec                   | 56.1 (± 6.2)   | 56.0 (± 5.8)   |
| Number of active contact                         | 39.6 (± 3.1)   | 37.7 (± 2.4)   |

Data represent mean (± SEM).
